# Supplementary material for: Detection of Highly Differentiated Genomic Regions Between Lotus (Nelumbo nucifera Gaertn.) With Contrasting Plant Architecture and Their Functional Relevance to Plant Architecture
Source: Front Plant Sci. 2018 Aug 20;9:1219. doi: 10.3389/fpls.2018.01219 (PMC6110191; doi:10.3389/fpls.2018.01219)
Supplement: Supplementary file 2 [file Data_Sheet_2.XLSX]

## Sheet: Supplementary Table 1
Supplementary Table 1. The 21 large architecture (LA) and 22 small architecture (SA) lotus germplasms located at the 15% ends of the phenotypic distributions of plant architecture in all 3 years. Germplasms used for cell morphological analyses and whole genome re-sequencing analyses are highlighted in bold.
Number	Large architecture lotus germplasms	Small architecture lotus germplasms
1	Chongtai lotus	Jinlingzhixing
2	Qianban lotus	Danyue
3	Fengjuanhongqi	Zuidongfeng
4	Xingkongmudan	Hongyun
5	Yuchan	Xiaoqu
6	Xiangbihe	Xiaojingling
7	Shuguangxiu	Honghehuan
8	Donghuxinhong	Jinlinghuodu
9	Hongtai lotus	Qinhuaibaiyu
10	Number 689	Hongchong
11	Mohe	Jiguang
12	Benyue	Jinzhuluoyupan
13	Echenghonglian	Dafeng
14	Yanermei	Lvfanghanzhu
15	Dansajin	Yanzhilu
16	Xingkongmudan	Shuimeiren
17	Changbanxiaotaohong	Ruixue
18	Puzheheihonghe	Xiezhuahong
19	Yizhangyulian	Yimengqingsi
20	Shaoxinghonglian	Qinhuairenjia
21	Guoqinghong	Manao
22		Xiyanghong

## Sheet: Supplementary Table 2
Supplementary Table 2. The validation primers and results of the selected 30 insertions and deletions (InDels) and 31 single nucleotide polymorphisms (SNPs).
Variation type	Scaffold ID	Physical position	Reference	Alteration	Forward Primer (5'→3')	Reverse Primer (5'→3')	Tm (°C)	Product length (bp)	'Chongtai lotus'			'Qianban lotus'			'Fengjuanhongqi'			'Xingkongmudan'			'Yuchan'			'Xiangbihe'			'Shuguangxiu '			'Donghuxinhong '			'Hongtai lotus '			'Number 689'			'Jinlingzhixing'			'Danyue'			'Zuidongfeng'			'Hongyun '
									Re-sequencing genotypes	Genotypes validation	Validation results	Re-sequencing genotypes	Genotypes validation	Validation results	Re-sequencing genotypes	Genotypes validation	Validation results	Re-sequencing genotypes	Genotypes validation	Validation results	Re-sequencing genotypes	Genotypes validation	Validation results	Re-sequencing genotypes	Genotypes validation	Validation results	Re-sequencing genotypes	Genotypes validation	Validation results	Re-sequencing genotypes	Genotypes validation	Validation results	Re-sequencing genotypes	Genotypes validation	Validation results	Re-sequencing genotypes	Genotypes validation	Validation results	Re-sequencing genotypes	Genotypes validation	Validation results	Re-sequencing genotypes	Genotypes validation	Validation results	Re-sequencing genotypes	Genotypes validation	Validation results	Re-sequencing genotypes	Genotypes validation
InDel	NW_010729161.1	1156081	GCTCAAGGAGGAGATAAGAGATGAGA	-	GAGCTGCTTCTACACCCACA	TGCACACATGTGGATTTGCC	59.678	216	0/0	0/0	√	0/0	0/0	√	1/1	1/1	√	0/1	0/1	√	0/1	0/1	√	0/1	0/1	√	1/1	1/1	√	0/1	0/1	√	0/0	0/0	√	0/1	0/1	√	1/1	1/1	√	1/1	1/1	√	1/1	1/1	√	1/1	1/1
InDel	NW_010729192.1	1195465	TTTAC	-	CCTCCTGAGGCTTTCCTTTCA	CCTCCTTTTCATCTGTCCCAGT	59.648	281	0/1	0/1	√	0/1	0/1	√	0/1	0/1	√	0/0	0/0	√	0/0	0/0	√	0/0	0/0	√	0/1	0/1	√	0/1	0/1	√	0/1	0/1	√	0/0	0/1	×	0/0	0/0	√	0/0	0/0	√	0/0	0/0	√	0/0	0/0
InDel	NW_010729334.1	596595	CTT	-	CTCGCATGATCAACTTGCCG	CGGCGAGTGAGGGTTGTATT	59.973	296	0/0	0/0	√	0/0	0/0	√	1/1	1/1	√	0/1	0/1	√	0/1	0/1	√	0/1	0/1	√	1/1	1/1	√	0/1	0/1	√	0/0	0/0	√	0/1	0/1	√	1/1	1/1	√	1/1	1/1	√	1/1	1/1	√	0/1	0/1
InDel	NW_010729129.1	1614716	ATG	-	ACATTCCTCTACGGGTGGGA	ACCACCGTTAGGCAAAATGC	59.958	160	0/0	0/0	√	0/1	0/0	×	1/1	1/1	√	0/1	0/1	√	0/1	0/1	√	0/1	0/1	√	1/1	1/1	√	0/1	0/1	√	0/0	0/0	√	0/1	0/1	√	1/1	1/1	√	1/1	1/1	√	0/1	0/1	√	1/1	1/1
InDel	NW_010729194.1	78851	CTTCACCTAGAT	-	GGGCCAACGGTCCTACTATC	TGGTCCGAGTCAAATAGCGT	59.608	290	0/0	0/0	√	0/0	0/0	√	0/0	0/0	√	0/0	0/0	√	0/1	0/1	√	0/0	0/1	×	0/1	0/1	√	0/0	0/0	√	0/0	0/0	√	0/0	0/0	√	1/1	1/1	√	1/1	1/1	√	1/1	1/1	√	0/1	0/1
InDel	NW_010729169.1	685066	TTACTGGA	-	TGGGCCAGGTTTAGATTGGAC	GGGCTGTCAATGGAGTGGAT	59.995	193	0/1	0/1	√	0/1	0/1	√	1/1	1/1	√	0/1	0/1	√	0/0	0/0	√	0/0	0/0	√	0/1	0/1	√	0/1	0/1	√	0/1	0/1	√	0/1	0/1	√	0/0	0/0	√	0/0	0/0	√	0/0	0/0	√	0/0	0/0
InDel	NW_010729253.1	505115	CCA	-	TCTTCCCTCCTCCTCTTCCG	CCTTGCTTGTTTCTGCACCC	60.033	247	0/0	0/0	√	0/0	0/0	√	0/1	0/1	√	0/1	0/1	√	0/1	0/1	√	0/1	0/1	√	0/1	0/1	√	0/0	0/0	√	0/0	0/0	√	0/0	0/0	√	1/1	1/1	√	1/1	1/1	√	1/1	1/1	√	0/1	0/1
InDel	NW_010729094.1	5555992	TAG	-	ACCACCTGCACCCAAAAAGA	CTGCCCAACACTCTACTCCA	60.033	299	0/0	0/0	√	0/0	0/0	√	0/0	0/0	√	0/0	0/0	√	0/1	0/1	√	0/1	0/1	√	0/0	0/0	√	0/1	0/1	√	0/0	0/0	√	0/0	0/0	√	1/1	1/1	√	0/1	0/1	√	1/1	1/1	√	1/1	1/1
InDel	NW_010729485.1	55949	-	GCGCCGATGGTTACAATG	GCAGTGTTGTGTCTGATGCC	CACTAACCACCAGCGATGGT	59.761	192	0/1	0/1	√	0/1	0/1	√	0/1	0/1	√	0/1	0/1	√	0/1	0/1	√	0/1	0/1	√	0/1	0/1	√	0/0	0/0	√	0/1	0/1	√	0/0	0/0	√	1/1	1/1	√	1/1	1/1	√	1/1	1/1	√	0/1	0/1
InDel	NW_010729075.1	9450327	-	TACGTTTGGTAAGAAAACAAAA	AGGTGGACTTCAGTCTTGGA	ACACTGAAGCCCCAAAGGAG	57.897	295	0/1	0/1	√	0/1	0/1	√	1/1	1/1	√	1/1	1/1	√	0/0	0/0	√	0/0	0/0	√	1/1	1/1	√	0/1	0/1	√	0/1	0/1	√	0/1	1/1	×	0/0	0/0	√	0/1	0/1	√	0/0	0/0	√	0/0	0/0
InDel	NW_010729353.1	51068	-	GCCTTGTAGCGAGCT	CCCAATCGGAGGAGTGACAC	GTGAGCTAGGATAACCGCCC	60.108	299	0/0	0/1	×	0/0	0/1	×	0/1	0/1	√	0/1	0/1	√	0/1	0/1	√	0/1	0/1	√	0/1	0/1	√	0/0	0/1	×	0/0	0/1	×	0/0	0/1	×	1/1	1/1	√	1/1	1/1	√	1/1	1/1	√	0/1	0/1
InDel	NW_010729099.1	3574026	GTCGACTAGCTC	-	AACGCTGACTCTCGCTATCG	AAACTCAGGAGCTCATGCCC	59.972	290	0/1	0/1	√	0/1	0/1	√	0/1	1/1	×	1/1	1/1	√	0/0	0/0	√	0/1	0/1	√	1/1	1/1	√	0/1	0/1	√	0/1	0/1	√	1/1	1/1	√	0/0	0/0	√	0/1	0/1	√	0/0	0/0	√	0/0	0/0
InDel	NW_010729380.1	111247	AGGATTGTGTTT	-	CCAGGTGTAGGTGGGATTCG	GTCCTCACTCCTCAAAATGAACA	59.822	299	0/1	0/1	√	0/1	0/1	√	0/1	0/1	√	0/1	0/1	√	0/1	0/1	√	0/1	0/1	√	0/1	0/1	√	0/0	0/0	√	0/1	0/1	√	0/0	0/0	√	1/1	1/1	√	1/1	1/1	√	1/1	1/1	√	0/1	0/1
InDel	NW_010729229.1	589933	CAGGCGCGACGGTCATTCAGGATGTTGCGGAGATTCGAGATGTGT	-	CCCGTCGAATTGCCTTGTTC	GCCGATAACCAATGTCGTGC	59.832	278	0/1	0/1	√	0/1	0/1	√	0/1	0/1	√	0/1	0/1	√	0/0	0/0	√	0/0	0/0	√	0/1	0/1	√	0/1	0/1	√	0/1	0/1	√	0/1	1/1	×	0/0	0/0	√	0/0	0/0	√	0/0	0/0	√	0/0	0/0
InDel	NW_010729262.1	75413	GGCGCTCTTC	-	GGGGGCGAAAAGTCTTACCA	GGGAGAGGCGTAGAAGAAGC	59.963	271	0/0	0/0	√	0/0	0/0	√	1/1	1/1	√	0/1	0/1	√	0/1	0/1	√	0/1	0/1	√	1/1	1/1	√	0/1	0/1	√	0/0	0/0	√	0/1	0/1	√	1/1	1/1	√	1/1	1/1	√	1/1	1/1	√	1/1	1/1
InDel	NW_010729145.1	2244665	-	TACTA	CTGTGGAGCAGCTTGAGACT	AAGCGGGTCACCACAAAGAA	59.679	232	0/0	0/0	√	0/0	0/0	√	1/1	1/1	√	0/0	0/0	√	0/1	0/1	√	0/1	0/1	√	0/0	0/0	√	0/0	0/0	√	0/0	0/0	√	0/1	0/1	√	1/1	1/1	√	1/1	1/1	√	1/1	1/1	√	1/1	1/1
InDel	NW_010729193.1	44981	GAG	-	AAGAGGAAGTGGGAGTCCGA	TCCCTTGATGGTCTCTCGTCT	59.885	284	0/0	0/0	√	0/0	0/0	√	0/1	0/1	√	1/1	0/1	×	0/1	0/1	√	0/1	0/1	√	0/1	1/1	×	0/0	0/0	√	0/0	0/0	√	0/0	0/0	√	1/1	1/1	√	1/1	1/1	√	1/1	1/1	√	0/1	0/1
InDel	NW_010729084.1	9641732	-	CTGAAAAAAT	ACCCATCTCTCCAACTCCCA	TGTTGGGTACGTGATGCTGA	59.881	292	0/1	0/1	√	0/1	0/1	√	0/1	0/1	√	0/1	0/1	√	0/1	0/1	√	0/1	0/1	√	0/1	0/1	√	0/0	0/0	√	0/1	0/1	√	0/0	0/0	√	1/1	1/1	√	1/1	1/1	√	1/1	1/1	√	0/1	0/1
InDel	NW_010729267.1	178588	TAACATAAT	-	GTCCCTTGTTAGCGGGTCTC	ACCCCCAAGTTCAGATTTGTGA	60.108	255	0/0	0/0	√	0/0	0/0	√	1/1	1/1	√	0/1	0/1	√	0/1	0/1	√	0/1	0/1	√	1/1	1/1	√	0/1	0/1	√	0/0	0/0	√	0/1	0/1	√	1/1	1/1	√	1/1	1/1	√	1/1	1/1	√	0/1	0/1
InDel	NW_010729243.1	75982	CTTTAAAACATT	-	GGGGCATTCATAACATGTGTCA	TGCCTGTTCTGCCTAGCTTG	58.977	232	0/1	0/1	√	0/1	0/1	√	1/1	1/1	√	0/1	0/1	√	0/1	0/1	√	0/0	0/1	×	1/1	1/1	√	0/1	0/1	√	0/1	0/1	√	0/1	0/1	√	1/1	1/1	√	1/1	1/1	√	1/1	1/1	√	0/1	0/1
InDel	NW_010729239.1	562273	TATGG	-	GCAGTACCCAGTCCATCCAG	TGCACGTCAGCATACTAAACCT	59.821	254	0/1	0/1	√	0/1	0/1	√	1/1	1/1	√	0/1	0/1	√	0/1	0/1	√	0/1	0/1	√	1/1	1/1	√	0/1	0/1	√	0/1	0/1	√	0/1	0/1	√	1/1	1/1	√	1/1	1/1	√	1/1	1/1	√	0/1	0/1
InDel	NW_010729125.1	1994072	GAGAGAGAGA	-	GCAGCATGAAAGAACCCAGC	GCAAACCAACAACGGCTTCT	60.109	249	1/1	1/1	√	1/1	1/1	√	0/1	0/1	√	0/1	0/1	√	0/1	0/1	√	0/0	0/0	√	0/0	0/0	√	0/1	0/1	√	1/1	1/1	√	1/1	1/1	√	0/0	0/0	√	0/0	0/0	√	0/0	0/0	√	0/0	0/0
InDel	NW_010729433.1	85533	ACCTTGCCAAGGTACT	-	GTGTTGGAAGGAGGTCAGCT	TGAAGCATGCCTCATCCTCA	59.602	266	0/1	0/1	√	0/1	0/1	√	0/1	0/1	√	0/1	0/1	√	0/0	0/0	√	0/0	0/0	√	0/1	0/1	√	0/1	0/1	√	0/1	0/1	√	1/1	1/1	√	0/0	0/0	√	0/0	0/0	√	0/0	0/0	√	0/0	0/0
InDel	NW_010729347.1	211306	-	CCTCTTCCA	TCCTGCAGTTGTCCCTCTCT	CTACCAAGTCAGGCCATGGG	60.179	268	0/0	0/0	√	0/0	0/0	√	1/1	1/1	√	0/1	0/1	√	0/1	0/1	√	0/1	0/1	√	1/1	1/1	√	0/1	0/1	√	0/0	0/0	√	0/1	0/1	√	1/1	1/1	√	1/1	1/1	√	1/1	1/1	√	0/1	0/1
InDel	NW_010729148.1	78647	ATGCAGA	-	GGCTAGTTGGTGCCTAGGTG	CTCAACCCATCCAGCCTTGT	60.108	184	0/1	0/1	√	0/1	0/1	√	0/1	0/1	√	0/1	0/1	√	0/0	0/0	√	0/0	0/0	√	0/1	0/1	√	0/1	0/1	√	0/1	0/1	√	1/1	1/1	√	0/0	0/0	√	0/0	0/0	√	0/0	0/0	√	0/0	0/0
InDel	NW_010729325.1	379117	AGGG	-	GGTTTGGGGGAAGGAAGAGA	ATCCAATGACCGATCGCAGG	58.927	206	0/1	0/1	√	0/1	0/1	√	1/1	1/1	√	0/1	0/1	√	0/1	0/1	√	0/1	0/1	√	1/1	1/1	√	0/0	0/0	√	0/1	0/1	√	0/0	0/0	√	1/1	1/1	√	1/1	1/1	√	1/1	1/1	√	0/1	0/1
InDel	NW_010729467.1	209271	CTGAAG	-	TGCCGGGAAAGGACATTACC	CGGCCACTCCTCAGTCTTTT	60.035	284	1/1	1/1	√	1/1	1/1	√	0/1	0/1	√	0/0	0/0	√	0/0	0/0	√	0/1	0/1	√	0/0	0/0	√	1/1	1/1	√	1/1	1/1	√	0/1	0/1	√	0/0	0/0	√	0/0	0/0	√	0/0	0/0	√	0/0	0/0
InDel	NW_010729441.1	49855	-	GGAAAGGGAAAG	ACCACGACCCGAGCTACTAT	TGACAAAAACCTCCCTTCCATCA	60.107	227	0/1	0/1	√	0/1	0/1	√	1/1	1/1	√	0/1	0/1	√	0/1	0/1	√	0/1	0/1	√	1/1	1/1	√	0/1	0/1	√	0/1	0/1	√	0/1	0/1	√	1/1	1/1	√	1/1	1/1	√	0/1	1/1	×	1/1	1/1
InDel	NW_010729594.1	23661	TAAAACGAGTA	-	ACTAGCTAGTTTCGGCAGGT	TAGGGACTAGCTTGGGAGCA	58.442	274	0/0	0/0	√	0/0	0/0	√	0/1	0/1	√	0/1	0/1	√	0/0	0/1	×	0/1	0/1	√	0/1	0/1	√	0/0	0/0	√	0/0	0/0	√	0/0	0/0	√	1/1	1/1	√	1/1	1/1	√	1/1	1/1	√	0/1	0/1
InDel	NW_010729358.1	126630	ATTTATATATGCATAT	-	ACCAGGCAAATGAATGGGGT	CAAACAACCTTGCAGTTTGC	59.883	219	0/0	0/0	√	0/0	0/0	√	1/1	1/1	√	0/1	0/1	√	0/1	0/1	√	0/1	0/1	√	1/1	1/1	√	0/1	0/1	√	0/0	0/0	√	0/1	0/1	√	1/1	1/1	√	1/1	1/1	√	1/1	1/1	√	0/1	0/1
SNP	NW_010729075.1	109875	C	G	GCCACAACTCCAACTGAACC	TGGGCATGATCAGATTAGGAACT	59.3065	242	0/0	0/0	√	0/0	0/0	√	0/0	0/0	√	0/1	0/1	√	0/0	0/0	√	0/0	0/0	√	0/0	0/0	√	0/0	0/0	√	0/0	0/0	√	0/1	0/1	√	0/0	0/0	√	0/0	0/0	√	0/0	0/0	√	0/0	0/0
SNP	NW_010729075.1	109899	A	G					0/0	0/0	√	0/0	0/0	√	0/0	0/0	√	0/0	0/0	√	0/0	0/0	√	0/0	0/0	√	0/0	0/0	√	0/0	0/0	√	0/0	0/0	√	0/0	0/0	√	0/0	0/0	√	0/0	0/0	√	0/0	0/0	√	0/0	0/0
SNP	NW_010729078.1	178192	T	C	TCCTTCACGAACCAAACAGA	AGATCTGGATGAGCAGCAGC	58.4505	266	0/1	0/1	√	0/1	0/1	√	1/1	1/1	√	1/1	1/1	√	0/1	0/1	√	0/1	0/1	√	1/1	1/1	√	0/1	0/1	√	0/1	0/1	√	1/1	1/1	√	0/1	0/1	√	1/1	1/1	√	0/0	0/0	√	0/0	0/0
SNP	NW_010729080.1	283425	G	A	AGTACAAAACTGCTTCGCGG	CTGCAGCTGGGCAATTGAAA	59.4075	223	0/0	0/0	√	0/0	0/0	√	0/0	0/0	√	0/0	0/0	√	0/0	0/0	√	0/0	0/0	√	0/0	0/0	√	0/0	0/0	√	0/0	0/0	√	0/0	0/0	√	0/0	0/0	√	0/0	0/0	√	0/0	0/0	√	0/0	0/0
SNP	NW_010729080.1	283484	T	C					0/0	0/0	√	0/0	0/0	√	0/0	0/0	√	0/0	0/0	√	0/0	0/0	√	0/0	0/0	√	0/0	0/0	√	0/0	0/0	√	0/0	0/0	√	0/0	0/0	√	0/0	0/0	√	0/0	0/0	√	0/0	0/0	√	0/0	0/0
SNP	NW_010729089.1	24645	C	A	CCCAGTCTTCCATGTGTCCC	AACTGGGTTTGCAACTCCCA	60.03	234	0/0	0/0	√	0/0	0/0	√	0/0	0/0	√	0/0	0/0	√	0/0	0/0	√	0/0	0/0	√	0/0	0/0	√	0/0	0/0	√	0/0	0/0	√	0/0	0/0	√	0/0	0/0	√	0/0	0/0	√	0/0	0/0	√	0/0	0/0
SNP	NW_010729089.1	24705	G	A					0/0	0/0	√	0/0	0/0	√	0/0	0/0	√	0/0	0/0	√	0/0	0/0	√	0/0	0/0	√	0/0	0/0	√	0/0	0/0	√	0/0	0/0	√	0/0	0/0	√	0/0	0/0	√	0/0	0/0	√	0/0	0/0	√	0/0	0/0
SNP	NW_010729091.1	4391781	G	A	AGAAGCTGCCTCGTCAATCC	GCTATCCCTTCTTGCAGCCA	60.11	224	0/0	0/0	√	0/0	0/0	√	0/0	0/0	√	0/0	0/0	√	0/0	0/0	√	0/0	0/0	√	0/0	0/0	√	0/1	0/1	√	0/0	0/0	√	0/0	0/0	√	0/0	0/0	√	0/0	0/0	√	0/0	0/0	√	0/0	0/0
SNP	NW_010729091.1	4391803	T	C					0/1	0/1	√	0/1	0/1	√	1/1	1/1	√	1/1	1/1	√	0/1	0/1	√	0/0	0/0	√	1/1	1/1	√	0/1	0/1	√	0/1	0/1	√	1/1	1/1	√	0/1	0/1	√	1/1	1/1	√	0/1	0/1	√	0/1	0/1
SNP	NW_010729096.1	5030775	A	G	ACCACCGATCCTTGCTGAAG	TGTGCAGCTGTTGGAATACCT	59.98	274	0/0	0/0	√	0/0	0/0	√	0/0	0/0	√	0/0	0/0	√	0/0	0/0	√	0/0	0/0	√	0/0	0/0	√	0/0	0/0	√	0/0	0/0	√	0/0	0/0	√	0/0	0/0	√	0/0	0/0	√	0/0	0/0	√	0/0	0/0
SNP	NW_010729096.1	5030794	T	C					0/0	0/0	√	0/0	0/0	√	0/1	0/1	√	0/1	0/1	√	0/1	0/1	√	0/1	0/1	√	0/0	0/0	√	0/0	0/0	√	0/0	0/0	√	0/1	0/1	√	0/0	0/0	√	1/1	1/1	√	0/0	0/0	√	1/1	1/1
SNP	NW_010729100.1	64308	A	G	CTAAGTAGCGGAGGCAGGTG	TCCTACCAAATTAACTGAGCCTCA	59.68	255	0/0	0/0	√	0/0	0/0	√	0/0	0/0	√	0/0	0/0	√	0/0	0/0	√	0/0	0/0	√	0/0	0/0	√	0/0	0/0	√	0/0	0/0	√	0/0	0/0	√	0/0	0/0	√	0/0	0/0	√	0/0	0/0	√	0/0	0/0
SNP	NW_010729100.1	64350	G	A					0/0	0/0	√	0/0	0/0	√	0/0	0/0	√	0/0	0/0	√	0/0	0/0	√	0/0	0/0	√	0/0	0/0	√	0/0	0/0	√	0/0	0/0	√	0/0	0/0	√	0/0	0/0	√	0/0	0/0	√	0/0	0/0	√	0/0	0/0
SNP	NW_010729100.1	64390	G	A					0/1	0/1	√	0/1	0/1	√	1/1	1/1	√	1/1	1/1	√	0/0	0/0	√	1/1	1/1	√	1/1	1/1	√	0/1	0/1	√	0/1	0/1	√	1/1	1/1	√	0/1	0/1	√	0/1	0/1	√	0/1	0/1	√	0/1	0/1
SNP	NW_010729101.1	93570	T	G	TGACCGTGAGACAAAGACCG	TCCTGCACAAATGGGGTTGA	59.89	240	1/1	1/1	√	1/1	1/1	√	1/1	1/1	√	1/1	1/1	√	1/1	1/1	√	0/1	0/1	√	1/1	1/1	√	1/1	1/1	√	1/1	1/1	√	1/1	1/1	√	1/1	1/1	√	1/1	1/1	√	1/1	1/1	√	1/1	1/1
SNP	NW_010729101.1	93606	A	G					0/1	0/1	√	0/1	0/1	√	0/1	0/1	√	1/1	1/1	√	0/0	0/0	√	0/1	0/1	√	0/1	1/1	×	0/1	0/1	√	0/1	0/1	√	0/1	0/1	√	0/1	0/1	√	0/0	0/0	√	0/0	0/0	√	0/0	0/0
SNP	NW_010729283.1	205583	C	T	TTCGAACGGGGCTGATTTGA	CGCCCCCTCCTCCTTCTATA	59.92	287	0/0	0/0	√	0/0	0/0	√	1/1	1/1	√	1/1	1/1	√	0/0	0/0	√	0/1	0/1	√	1/1	1/1	√	0/1	0/1	√	0/0	0/0	√	0/1	0/1	√	0/1	0/1	√	0/0	0/0	√	0/1	0/1	√	0/1	0/1
SNP	NW_010729283.1	205588	C	T					0/0	0/0	√	0/0	0/0	√	1/1	1/1	√	1/1	1/1	√	0/0	0/0	√	0/1	0/1	√	1/1	1/1	√	0/1	0/1	√	0/0	0/0	√	0/1	0/1	√	0/1	0/1	√	0/0	0/0	√	0/1	0/1	√	0/1	0/1
SNP	NW_010729217.1	768158	C	T	TGCTTGGGGTTTTATCAAGGT	CGATCCGTTGGAGGGGTAAG	58.82	280	0/0	0/0	√	0/0	0/0	√	0/0	0/0	√	0/0	0/0	√	0/0	0/0	√	0/0	0/0	√	0/0	0/0	√	0/0	0/0	√	0/0	0/0	√	0/0	0/0	√	0/0	0/0	√	0/0	0/0	√	0/0	0/0	√	0/0	0/0
SNP	NW_010729217.1	768240	A	G					0/0	0/0	√	0/0	0/0	√	0/0	0/0	√	0/0	0/0	√	0/0	0/0	√	0/0	0/0	√	0/0	0/0	√	0/0	0/0	√	0/0	0/0	√	0/0	0/0	√	0/0	0/0	√	0/0	0/0	√	0/0	0/0	√	0/0	0/0
SNP	NW_010729217.1	768300	G	A					0/0	0/0	√	0/0	0/0	√	0/0	0/0	√	0/0	0/0	√	0/0	0/0	√	0/0	0/0	√	0/0	0/0	√	0/0	0/0	√	0/0	0/0	√	0/0	0/0	√	0/0	0/0	√	0/0	0/0	√	0/0	0/0	√	0/0	0/0
SNP	NW_010729209.1	1585378	C	T	GAGATCAACCACCCCCACTG	TGGTTGCCATGACTTCGTGA	59.9635	263	0/0	0/0	√	0/0	0/0	√	0/0	0/0	√	0/0	0/0	√	0/0	0/0	√	0/0	0/0	√	0/0	0/0	√	0/0	0/0	√	0/0	0/0	√	0/0	0/0	√	0/0	0/0	√	0/0	0/0	√	0/0	0/0	√	0/0	0/0
SNP	NW_010729194.1	753286	T	A	TGCCCTGCTAAGGCTACTAGA	TGTTCAAAGCTTGGTTTTAGGGG	59.84	252	0/0	0/0	√	0/0	0/0	√	0/0	0/0	√	0/0	0/0	√	0/0	0/0	√	0/0	0/0	√	0/0	0/0	√	0/0	0/0	√	0/0	0/0	√	0/0	0/0	√	0/0	0/0	√	0/0	0/0	√	0/0	0/0	√	0/0	0/0
SNP	NW_010729194.1	753370	C	T					0/0	0/0	√	0/0	0/0	√	0/0	0/0	√	0/0	0/0	√	0/0	0/0	√	0/0	0/0	√	0/0	0/0	√	0/0	0/0	√	0/0	0/0	√	0/0	0/0	√	0/0	0/0	√	0/0	0/0	√	0/0	0/0	√	0/0	0/0
SNP	NW_010729131.1	1407878	T	C	TGAACTGGACTGGACCAATCC	ATTCGACCCTGCATGCATCA	59.88	238	0/0	0/0	√	0/0	0/0	√	0/0	0/0	√	0/0	0/0	√	0/0	0/0	√	0/0	0/0	√	0/0	0/0	√	0/0	0/0	√	0/0	0/0	√	0/0	0/0	√	0/0	0/0	√	0/0	0/0	√	0/0	0/0	√	0/0	0/0
SNP	NW_010729131.1	1407887	G	A					0/0	0/0	√	0/0	0/0	√	0/0	0/0	√	0/0	0/0	√	0/0	0/0	√	0/0	0/0	√	0/1	0/1	√	0/1	0/1	√	0/0	0/0	√	0/0	0/0	√	0/0	0/0	√	0/0	0/0	√	0/0	0/0	√	0/0	0/0
SNP	NW_010729117.1	2678459	G	A	CTCGATACCACCATCCACCA	TTCTGTGACAGGCTTCTGCA	59.21	288	0/0	0/0	√	0/0	0/0	√	0/0	0/0	√	0/0	0/0	√	0/0	0/0	√	0/0	0/0	√	0/0	0/0	√	0/0	0/0	√	0/0	0/0	√	0/0	0/0	√	0/0	0/0	√	0/0	0/0	√	0/0	0/0	√	0/0	0/0
SNP	NW_010729117.1	2678514	C	T					0/0	0/0	√	0/0	0/0	√	0/0	0/0	√	0/0	0/0	√	0/0	0/0	√	0/0	0/0	√	0/0	0/0	√	0/0	0/0	√	0/0	0/0	√	0/0	0/0	√	0/0	0/0	√	0/0	0/0	√	0/0	0/0	√	0/0	0/0
SNP	NW_010729117.1	2678572	C	A					0/0	0/0	√	0/0	0/0	√	0/0	0/0	√	0/0	0/0	√	0/0	0/0	√	0/0	0/0	√	0/0	0/0	√	0/0	0/0	√	0/0	0/0	√	0/0	0/0	√	0/0	0/0	√	0/0	0/0	√	0/0	0/0	√	0/0	0/0
SNP	NW_010729117.1	2678619	T	C					0/0	0/0	√	0/0	0/0	√	0/0	0/0	√	0/0	0/0	√	0/0	0/0	√	0/0	0/0	√	0/0	0/0	√	0/0	0/0	√	0/0	0/0	√	0/0	0/0	√	0/0	0/0	√	0/0	0/0	√	0/0	0/0	√	0/0	0/0
SNP	NW_010729117.1	2678636	T	C					0/0	0/0	√	0/0	0/0	√	0/0	0/0	√	0/0	0/0	√	0/0	0/0	√	0/0	0/0	√	0/0	0/0	√	0/0	0/0	√	0/0	0/0	√	0/0	0/0	√	0/0	0/0	√	0/0	0/0	√	0/0	0/0	√	0/0	0/0
0 represents the reference genotype, and 1 represents the alteration genotype.
√ and × represent the right and wrong the genotypes of lotus germplasms, respectively.
[truncated: 19 more columns]

## Sheet: Supplementary Table 3
Supplementary Table 3. Quantitative reverse transcription PCR (qRT-PCR) primer pairs of the six candidate genes related to lotus plant architecture.
Gene ID	Forward Primer (5'→3')	Reverse Primer (5'→3')	Product length (bp)
LOC104598259	TTCAAGAAGAACGCAAGAAAG	CAGGAGTCCGCTCATAAAACT	201
LOC104598313	ATGCGAGGATGATGTAGTGGTAG	CAATAAAATGACAAAGTAAACGAAGC	245
LOC104587827	GAGCTGGATGCCAGATTGTTAA	CAAGGCCAAGACGACTGTATG	264
LOC104589899	CTAGACACGGTGGCAACAAAG	TCAAACAGCAGTTCCACGATTAT	235
LOC104598294	CTTCGCAAATGCTCACTGTCT	AGCAGCAGTATTATCATTGTCGG	235
LOC104598311	GAAGACAAAACCACTCCCACT	CTCTAGCTTCCGAGTTCCTTAC	128
Actin	GCGTTCTGCCGTCTTCTAAA	CCCTCTTGGATTGTGCCTC	228

## Sheet: Supplementary Table 4
Supplementary Table 4. Primers of the InDel markers putatively associated with lotus plant architecture.InDel markers in bold showed distinct allelic distribution between the LA and SA lotus groups.
Indel ID	Scaffold ID	Physical position	Reference	Alteration	Forward Primer (5'→3')	Reverse Primer (5'→3')	Tm (℃)	Product length of reference allele (bp)	p-value of chi-square test
Lotus_Indel 1	NW_010729082.1	6205549	GTTCAGATTTACTGAA	-	TGCAACCTTTTCAGATGTCACA	TGGGCTTCCATGGTTTGTGT	59.41	282	0.202087
Lotus_Indel 2	NW_010729082.1	7286849	AGGTAT	-	TGGACAAGAAGAGTGGTGCA	ACCAAAACCGACAGACTGGT	59.309	160	0.0618787
Lotus_Indel 3	NW_010729082.1	8124488	-	TTAAACCAAACCCT	CTCCAGGTTGGTTAGGCAGG	TCAAGTCACGGCCCATGATC	60.0715	179	0.0293007
Lotus_Indel 4	NW_010729094.1	1370466	TTGTTTGTTCT	-	TGGTCCATTTGCACTACCCTC	ACACGTTGCATGCGTTTCAA	59.948	229	0.912804
Lotus_Indel 5	NW_010729094.1	1855340	TGTAT	-	AGGAAGGGAGACTGGAACCA	GTGACAAAATCGTCGCTCCG	59.8565	275	0.845211
Lotus_Indel 6	NW_010729094.1	2235402	-	ATGGGC	CCAGCAAGGATCCAACCCTT	TTTGCATCCCTACTGCAGCC	60.3205	296	0.912804
Lotus_Indel 7	NW_010729094.1	2933173	GTTTTGTATGAATA	-	GGAAAGGAAGGGAAAGGTGGT	GGCATAGCTGAGGTCAAGCA	59.9805	174	0.0398547
Lotus_Indel 8	NW_010729094.1	3411906	-	TTTTACAAGGGGTTTTAGG	TGGGGGATGTGTGCTTGAAA	CCCACCCCAGATCCAAAACT	59.702	195	0.594907
Lotus_Indel 9	NW_010729094.1	3879348	TTATT	-	TGCTTCCAGCTTTGGAGGAG	ATGTCCAAGATGCCAAGCCT	59.8145	192	0.594907
Lotus_Indel 10	NW_010729094.1	4177158	-	TATTTG	TCATGGCAGTATGTTACACTCTCA	CCCCCAAGGTCAACTTCCAA	59.6735	264	0.594907
Lotus_Indel 11	NW_010729094.1	5566124	-	GCTCT	CACCTTCGTCGCCCAATACT	GGAAGGTGACAGTGTGGTCT	59.6745	234	0.594907
Lotus_Indel 12	NW_010729099.1	2164202	TGAGAAGAAAACA	-	GGTGGATTTGGCCTGGGTAA	ATCACCAGGCCACACAAGTC	60.1055	299	0.936427
Lotus_Indel 13	NW_010729099.1	2448729	CAACATAGAAATCA	-	AACGGATGCTTCTGAGACCA	GTTACGAGGGTCCCAGGTTG	59.53	260	0.594907
Lotus_Indel 14	NW_010729125.1	1953397	AAATAGAGAACAAAT	-	GCAAAAGGAAGCACAATCCCT	CCAGCTGGTTGGTAAAAAGCT	59.208	277	0.0288052
Lotus_Indel 15	NW_010729126.1	1999929	-	CATTGCCAT	AACTCAAACCTTGCTCCCCC	TAAACCTTGCTCCCCCAACC	60.0325	234	0.00322768
Lotus_Indel 16	NW_010729126.1	2396955	TTTGTGCATGTTTAGTA	-	GGGGTAACAATGGAGTTTTGGA	CTCGTAGGGGAGTATAATGGAGA	58.289	300	0.000342036
Lotus_Indel 17	NW_010729126.1	2427880	TAGGGTATTAATTGAAGGGTTGTTTC	-	AGTCTTCACCATCCAAACGGT	ACGTCAAAAGTCAGTGCACTG	59.457	291	8.81041e-06
Lotus_Indel 18	NW_010729129.1	793912	GTCTGTATCGATTCG	-	TGGAATATGCTGCATCTGCCT	GTTTAAGGCTCCTCCACCCC	59.945	271	0.000667443
Lotus_Indel 19	NW_010729129.1	895214	-	ACTTTTATAAAAGT	GCTGGTATTCACAAACCGCC	GCACTTTTAGGAAATCACTTCTACG	59.1475	229	0.000244125
Lotus_Indel 20	NW_010729129.1	1126883	AATTATCATGTGACAACTTA	-	CCAAACCCAGATTCGACCCA	GAGACCCTCAAAGGCCACAA	59.926	271	8.35758e-05
Lotus_Indel 21	NW_010729129.1	1612164	-	ACATATTATATTATTAT	ACTGGTTGACTGACTGGTTGA	TGGTGGATGGATGGTAAGCT	58.784	281	0.00322768
Lotus_Indel 22	NW_010729129.1	3634252	-	TAAGGAAGGAGACCTGCTGGACTTCACGTTA	TATGTTCGACGCTCTCGCTC	TTTCTGTTCAGGGGTCGTCG	59.9695	291	0.00322768
Lotus_Indel 23	NW_010729129.1	3779879	CAAGGTAGCTCGCTA	-	TCGCTACGGAACAACTTGCT	AGGAAACGTGGGTGCAATCT	59.9285	262	0.000416094
Lotus_Indel 24	NW_010729161.1	356727	-	GGCCTATATCAGGCCCAAAATTTTCAGGGTCGGGTCTG	CTTACGGTTTCAGCCTGGGT	GATCATGACCCGAGCTGAGG	59.9655	190	0.000405797
Lotus_Indel 25	NW_010729161.1	843970	TATCGACCTGTATTGATGCTTTG	-	GGGCCTTAAACTGACCCCTC	GAGAGAGAGAGAGCGCGAGA	60.282	269	2.1366e-08
Lotus_Indel 26	NW_010729161.1	1020253	CATATTGGGTTAATTGGGCCCCAGGCAAATTTGG	-	GGTTTGAGCGCAAAGAGTGG	ACCCTTGTTTGCCCCTTCAT	59.9245	251	0.000150247
Lotus_Indel 27	NW_010729161.1	1335498	ATTTAA	-	TCCATGGATCGTGAAAGGCA	AGGGTTTCGAATGTGTTAGGGT	59.504	286	5.83656e-08
Lotus_Indel 28	NW_010729161.1	1375008	AAAGGACTTCGGTTTG	-	ACCCCTTGATTGCCCCAAAA	TGCATTCGTTTCCCCTTTCG	59.6135	295	0.000331646
Lotus_Indel 29	NW_010729161.1	1676524	GGGGTAATA	-	GTGTCAATGCCGAAACACCC	ATGTTGGGAGTGGGACAAGT	59.4455	289	0.00596459
Lotus_Indel 30	NW_010729161.1	1956279	GATAAAGGAA	-	GCTCCGCCACTTCCTTTATTG	TGCCAAACCCATCATGATCTGT	59.945	163	3.75221e-05
Lotus_Indel 31	NW_010729161.1	2490122	TTCCCTTAGGTAGATGC	-	GCCTTGTGTTGTCCCTTTGT	AGGAAGCAAGATTTGGGGGC	59.7525	227	3.75221e-05
Lotus_Indel 32	NW_010729194.1	95062	GTTTTTACAAT	-	TGAGTTTCTCTCATGGCAAGGA	TGTGAGGGGGAGTCGATCAT	59.6965	284	7.14738e-05
Lotus_Indel 33	NW_010729229.1	606824	CACCTATTTTACAATTATGAACATATAGCATTGTTTGGGGTCATGGAT	-	CACGGCAAACAAACTAAGCCA	CCACATAGGTGCCACGTGAC	60.4765	299	2.29923e-07
Lotus_Indel 34	NW_010729243.1	108399	-	TCAATAGAAAAAGAA	TCCATGGATTCATACATCTCGGT	CACGTCATGTTGCTTCCCAC	59.429	278	0.0613297
Lotus_Indel 35	NW_010729262.1	421608	AAAATACCCCTAAA	-	GGTGGACTGAATGATAAAAACCCC	AGACGCAGGTGATTGAAGGA	59.4315	299	0.00290384
Lotus_Indel 36	NW_010729262.1	506785	-	CATTA	TCACTGATAGTCCCCTGAGGA	ATGACAGTCTCCGACAGTGC	59.4125	264	5.25265e-05
Lotus_Indel 37	NW_010729262.1	723675	-	TGATAGGTT	TCCAAACCCTGCACATGATCT	GGCTGGAGCTCAACTTCCAA	59.948	159	5.25265e-05
Lotus_Indel 38	NW_010729262.1	756660	-	GGTCTCCACCGAGGAGGTCGCGGAATGGGC	CCAAGCACCCTCCGGTTATT	GTGAGTAACCGCTCTAGCCC	59.9655	233	5.25265e-05
Lotus_Indel 39	NW_010729262.1	824787	-	GACGCGAGGCAT	TGCTAATGATGGGGTGGCAG	AGGAAAGGGAAGGGAAGGGA	59.954	259	5.25265e-05
Lotus_Indel 40	NW_010729262.1	932506	TTTTCTTCTCCTTTCCATT	-	TCATCGGCAGCAACAAGGAT	TCCTGTTTCAGTTGGAGCCC	59.9625	190	5.25265e-05
Lotus_Indel 41	NW_010729262.1	967182	-	AAGAAGT	AGCAGCAACTAGTGACTGGC	GGAGCAGAGCCAACACTTCT	60.1425	278	0.166225
Lotus_Indel 42	NW_010729262.1	997799	-	GGTGTGGATTGTTTCTCTAGTAGAGTTTGGGAGG	GCATCTCAGCCTCAAGGTGT	CTCCAAGGGTCCTAGAGGGT	59.848	164	5.25265e-05
Lotus_Indel 43	NW_010729353.1	71407	-	CCAAGACTAGAACAACAA	ACACTCTACCGCAACAAGAACA	TGTCCACATTAGTTTTCAGCCG	59.674	295	2.29923e-07
Lotus_Indel 44	NW_010729353.1	476906	CTCTCTCTCTCTCTCT	-	TCCCATTTTCGAAAACCAGCA	TGGTGTCAGGACCAAATCAGG	59.3075	299	5.83656e-08
Lotus_Indel 45	NW_010729358.1	278742	ATATAGT	-	AGTTGCAGCCAGACCCAATT	GCCCAAGTTTGCCCATTGTC	60.25	295	5.06311e-10
Lotus_Indel 46	NW_010729378.1	78954	AGCCCG	-	GGCTCTCATGGCATCTACCC	CAAGTTGTAGGCCCGATGGT	59.9995	238	5.83656e-08
Lotus_Indel 47	NW_010729383.1	350542	TCGATGCACGCTGAGATGTTC	-	GCCCCAAAAACGTTCCACAA	TCCGAGTTTTCATCTGCCCC	59.9295	162	5.83656e-08
Lotus_Indel 48	NW_010729485.1	55427	GTTTTATCTGGAGAGA	-	AAGCAAGGCCCTTCACTAGC	TGGGCAGCTAACATGTCCAA	59.9595	180	0.000110909
Lotus_Indel 49	NW_010729485.1	121663	TCAAACTTATAAACA	-	CCCCAATTCTGGCCACTGAT	CCCCACCCCTGGATTGTTTA	59.6625	291	5.27273e-06
Lotus_Indel 50	NW_010729517.1	59443	CACTTA	-	CTAAACGCAGTGAACCGCTG	ATGGGCCGGGATGTTAAGTG	59.9715	181	5.83656e-08
InDel markers in bold showed distinct allelic distribution between the LA and SA lotus groups.

## Sheet: Supplementary Table 5
Supplementary Table 5. Number and functional annotation of SNPs and InDels identified among the 20 re-sequenced lotus germplasms.
Category	Number of SNPs	Total percentage	Category	Number of Indels	Total percentage
Upstream	236181	0.0303	Upstream	54886	0.0498
Exonic_Stop gain	1665	0.0002	Exonic_Stop gain	103	0.0001
Exonic_Stop loss	321	0	Exonic_Stop loss	22	0
Exonic_Synonymous	117680	0.0151	Exonic_Frameshift deletion	2002	0.0018
Exonic_Non-synonymous	144779	0.0186	Exonic_Frameshift insertion	958	0.0009
Intronic	2090709	0.2686	Exonic_Non-frameshift deletion	2844	0.0026
Splicing	618	0.0001	Exonic_Non-frameshift insertion	2065	0.0019
Downstream	237850	0.0306	Intronic	327807	0.2972
Upstream/Downstream	3131	0.0004	Splicing	333	0.0003
Intergenic	4948436	0.6357	Downstream	55083	0.0499
			Upstream/Downstream	753	0.0007
			Intergenic	654238	0.5931
Total	7784623	-	Total	1103064	-

## Sheet: Supplementary Table 6
Supplementary Table 6. Detailed information on the highly differentiated genomic regions between the LA and SA lotus groups.
No. of scaffolds	Scaffold ID	Start	End	Gene ID
1	NW_010729077.1	9215001	9270000	LOC104585665
		9590001	9675000	LOC104586932
2	NW_010729082.1	6090001	6155000	LOC104593509
				LOC104593510
				LOC104593693
		6175001	6280000	LOC104593511
				LOC104593512
				LOC104593517
				LOC104593516
		6305001	6370000	LOC104593518
		6425001	6600000	LOC104593695
				LOC104593696
		7240001	7315000	LOC104593522
				LOC104593542
				LOC104593545
				LOC104593546
		8115001	8175000	LOC104593574
				LOC104593575
		9355001	9410000	LOC104593623
				LOC104593625
				LOC104593710
				LOC104593723
3	NW_010729094.1	1335001	1475000	LOC104598249
				LOC104598251
		1780001	1895000	LOC104598252
				LOC104598258
				LOC104598259
				LOC104598373
		2110001	2265000	LOC104598260
				LOC104598263
				LOC104598264
				LOC104598265
				LOC104598267
				LOC104598268
				LOC104598266
		2325001	2410000	LOC104598270
		2910001	3445000	LOC104598287
				LOC104598290
				LOC104598291
				LOC104598292
				LOC104598293
				LOC104598294
				LOC104598295
				LOC104598378
				LOC104598379
				LOC104598381
		3545001	3705000	LOC104598300
				LOC104598302
				LOC104598304
		3820001	3975000	LOC104598382
				LOC104598306
				LOC104598308
		4090001	4250000	LOC104598309
				LOC104598310
				LOC104598311
				LOC104598312
				LOC104598313
				LOC104598383
		4480001	4630000	LOC104598322
				LOC104598387
		4820001	4885000	LOC104598327
		5375001	5615000	LOC104598334
				LOC104598336
4	NW_010729099.1	2030001	2100000	-
		2160001	2385000	LOC104599692
				LOC104599693
				LOC104599694
				LOC104599695
				LOC104599833
				LOC104599834
				LOC104599696
		2405001	2540000	LOC104599698
				LOC104599699
				LOC104599700
				LOC104599701
		2555001	2645000	LOC104599702
		3505001	3635000	LOC104599738
				LOC104599739
				LOC104599843
				LOC104599844
5	NW_010729125.1	1255001	1305000	LOC104605219
				LOC104605222
		1510001	1630000	LOC104605227
				LOC104605228
				LOC104605229
				LOC104605230
				LOC104605320
		1940001	2055000	LOC104605237
				LOC104605238
				LOC104605239
				LOC104605240
				LOC104605321
		2155001	2210000	LOC104605247
				LOC104605248
6	NW_010729126.1	1980001	2075000	LOC104605375
				LOC104605376
				LOC104605467
				LOC104605468
		2395001	2490000	LOC104605387
7	NW_010729129.1	1	100000	LOC104605771
				LOC104605773
		210001	300000	LOC104605774
				LOC104605775
				LOC104605862
				LOC104605882
		440001	645000	LOC104605780
				LOC104605864
		710001	805000	LOC104605783
				LOC104605784
				LOC104605785
		850001	1045000	LOC104605787
				LOC104605788
				LOC104605867
		1070001	1195000	LOC104605789
				LOC104605790
				LOC104605791
		1570001	1635000	LOC104605799
		3425001	3505000	LOC104605850
				LOC104605851
				LOC104605878
				LOC104605879
		3615001	3805000	LOC104605856
				LOC104605857
				LOC104605880
				LOC104605881
				LOC104605884
8	NW_010729148.1	1	165000	-
9	NW_010729161.1	160001	210000	LOC104609636
				LOC104609637
		290001	415000	LOC104609641
				LOC104609642
				LOC104609643
				LOC104609644
		470001	820000	LOC104609690
				LOC104609691
				LOC104609692
				LOC104609693
				LOC104609695
				LOC104609696
		840001	940000	LOC104609646
				LOC104609647
				LOC104609698
		950001	1075000	LOC104609652
				LOC104609653
				LOC104609699
		1205001	1305000	LOC104609655
				LOC104609656
		1335001	1450000	LOC104609657
				LOC104609658
				LOC104609704
		1625001	1725000	LOC104609663
				LOC104609664
				LOC104609665
				LOC104609706
		1850001	1985000	LOC104609670
				LOC104609672
				LOC104609673
				LOC104609674
				LOC104609675
				LOC104609707
				LOC104609708
		2120001	2215000	LOC104609676
				LOC104609681
		2325001	2420000	LOC104609683
				LOC104609685
		2430001	2545000	LOC104609687
10	NW_010729192.1	665001	725000	LOC104612081
				LOC104612082
		1175001	1230000	-
		1410001	1470000	LOC104612063
				LOC104612088
				LOC104612089
11	NW_010729193.1	775001	905000	LOC104612109
12	NW_010729194.1	80001	145000	LOC104612170
				LOC104612171
				LOC104612172
13	NW_010729223.1	265001	330000	LOC104586025
14	NW_010729229.1	540001	650000	LOC104586285
				LOC104586303
15	NW_010729239.1	1030001	1090000	LOC104586819
				LOC104586820
				LOC104586844
16	NW_010729243.1	55001	220000	LOC104586983
				LOC104586985
				LOC104586986
				LOC104586987
				LOC104586991
				LOC104586992
17	NW_010729253.1	385001	455000	-
		460001	555000	LOC104587512
				LOC104587513
				LOC104587524
		575001	635000	LOC104587515
18	NW_010729256.1	95001	180000	LOC104587628
				LOC104587630
19	NW_010729262.1	25001	195000	LOC104587812
				LOC104587814
		235001	460000	LOC104587816
				LOC104587818
				LOC104587819
				LOC104587820
				LOC104587821
				LOC104587833
				LOC104587832
		485001	1120000	LOC104587822
				LOC104587825
				LOC104587826
				LOC104587827
				LOC104587828
				LOC104587829
				LOC104587834
				LOC104587836
				LOC104587837
				LOC104587839
				LOC104587835
20	NW_010729267.1	155001	265000	LOC104587972
		745001	810000	LOC104587980
		1050001	1100000	LOC104587981
21	NW_010729353.1	1	130000	LOC104589889
				LOC104589900
				LOC104589901
		180001	255000	LOC104589892
				LOC104589893
		420001	480000	-
		495001	555000	LOC104589898
				LOC104589899
22	NW_010729358.1	205001	390000	LOC104589944
		450001	525000	LOC104589945
23	NW_010729378.1	70001	120000	LOC104590209
		200001	260000	LOC104590202
				LOC104590203
		265001	415000	LOC104590204
				LOC104590206
				LOC104590207
				LOC104590208
24	NW_010729380.1	395001	455000	-
25	NW_010729382.1	305001	385000	-
26	NW_010729383.1	335001	410000	LOC104590254
27	NW_010729409.1	1	125000	LOC104590465
				LOC104590466
28	NW_010729413.1	1	90000	-
29	NW_010729433.1	95001	255000	-
30	NW_010729441.1	100001	175000	LOC104590657
31	NW_010729442.1	10001	220000	LOC104590662
32	NW_010729485.1	15001	140000	LOC104590789
				LOC104590790
33	NW_010729516.1	70001	120000	-
34	NW_010729517.1	1	105000	-
35	NW_010729632.1	1	50000	LOC104590953
The genes which were detected in the highly differenciated ZFst regions and covered variants with distinct allelic distribution are highlighted in bold.

## Sheet: Supplementary Table 7
Supplementary Table 7. The significantly enrichment GO terms of the genes in highly differentiate regions between lotus LA and SA group.
GO_accession	Description	Term_type	Over_represented_pValue	Corrected_pValue	Transcript ID
GO:0004399	histidinol dehydrogenase activity	molecular_function	3.556e-15	1.5405e-11	XM_010253482.1,XM_010253481.1,XM_010253479.1,XM_010253478.1,XM_010253480.1,XM_010253484.1,XM_010253477.1,XM_010253483.1
GO:0006749	glutathione metabolic process	biological_process	3.2279e-11	6.9915e-08	XM_010253481.1,XM_010253479.1,XM_010253480.1,XM_010253478.1,XM_010245544.1,XM_010245547.1,XM_010245545.1,XM_010245549.1,XM_010253477.1,XM_010253482.1,XM_010245548.1,XM_010269933.1,XM_010245546.1
GO:0008409	5'-3' exonuclease activity	molecular_function	3.0982e-10	4.4737e-07	XM_010260317.1,XM_010260323.1,XM_010260321.1,XM_010260324.1,XM_010260318.1,XM_010260319.1,XM_010260316.1,XM_010260322.1
GO:0006575	cellular modified amino acid metabolic process	biological_process	1.6728e-09	1.8116e-06	XM_010253477.1,XM_010245547.1,XM_010245545.1,XM_010260318.1,XM_010253480.1,XM_010253478.1,XM_010260321.1,XM_010269933.1,XM_010260319.1,XM_010260242.1,XM_010245548.1,XM_010253482.1,XM_010260322.1,XM_010245549.1,XM_010260317.1,XM_010260323.1,XM_010253479.1,XM_010245544.1,XM_010253481.1,XM_010260241.1,XM_010260324.1,XM_010260316.1,XM_010245546.1
GO:0070085	glycosylation	biological_process	6.3504e-09	4.7513e-06	XM_010270794.1,XM_010260321.1,XM_010262407.1,XM_010260318.1,XM_010260319.1,XM_010262582.1,XM_010260322.1,XM_010262339.1,XM_010262581.1,XM_010260323.1,XM_010260317.1,XM_010262408.1,XM_010260324.1,XM_010276014.1,XM_010260279.1,XM_010262409.1,XM_010262340.1,XM_010270795.1,XM_010260316.1,XM_010262338.1
GO:0004970	ionotropic glutamate receptor activity	molecular_function	9.8711e-09	4.7513e-06	XM_010269908.1,XM_010269907.1,XM_010260322.1,XM_010269909.1,XM_010269905.1,XM_010269904.1,XM_010260316.1,XM_010260319.1,XM_010260315.1,XM_010269906.1,XM_010260318.1,XM_010260324.1,XM_010260321.1,XM_010260323.1,XM_010260317.1
GO:0005231	excitatory extracellular ligand-gated ion channel activity	molecular_function	9.8711e-09	4.7513e-06	XM_010269907.1,XM_010269908.1,XM_010269909.1,XM_010260322.1,XM_010260316.1,XM_010269905.1,XM_010269904.1,XM_010260315.1,XM_010260319.1,XM_010260318.1,XM_010269906.1,XM_010260321.1,XM_010260324.1,XM_010260317.1,XM_010260323.1
GO:0005234	extracellular-glutamate-gated ion channel activity	molecular_function	9.8711e-09	4.7513e-06	XM_010269906.1,XM_010260318.1,XM_010260321.1,XM_010260324.1,XM_010260317.1,XM_010260323.1,XM_010269907.1,XM_010269908.1,XM_010269909.1,XM_010260322.1,XM_010260316.1,XM_010269905.1,XM_010269904.1,XM_010260315.1,XM_010260319.1
GO:0008066	glutamate receptor activity	molecular_function	9.8711e-09	4.7513e-06	XM_010269907.1,XM_010269908.1,XM_010269909.1,XM_010260322.1,XM_010260316.1,XM_010269905.1,XM_010269904.1,XM_010260315.1,XM_010260319.1,XM_010260318.1,XM_010269906.1,XM_010260321.1,XM_010260324.1,XM_010260317.1,XM_010260323.1
GO:0006790	sulfur compound metabolic process	biological_process	2.5042e-08	9.9412e-06	XM_010260321.1,XM_010260318.1,XM_010253480.1,XM_010253478.1,XM_010245545.1,XM_010245547.1,XM_010253477.1,XM_010260322.1,XM_010253482.1,XM_010245548.1,XM_010260319.1,XM_010253414.1,XM_010269933.1,XM_010260324.1,XM_010253481.1,XM_010245544.1,XM_010253479.1,XM_010260323.1,XM_010260317.1,XM_010245549.1,XM_010245546.1,XM_010260316.1
GO:0008373	sialyltransferase activity	molecular_function	2.5243e-08	9.9412e-06	XM_010260316.1,XM_010260319.1,XM_010260322.1,XM_010260317.1,XM_010260323.1,XM_010260318.1,XM_010260321.1,XM_010260324.1
GO:0004652	polynucleotide adenylyltransferase activity	molecular_function	5.1818e-08	1.8706e-05	XM_010253481.1,XM_010253478.1,XM_010253479.1,XM_010253480.1,XM_010253484.1,XM_010253483.1,XM_010253477.1,XM_010253482.1
GO:0003840	gamma-glutamyltransferase activity	molecular_function	1.6366e-07	5.4538e-05	XM_010253481.1,XM_010253482.1,XM_010253479.1,XM_010253480.1,XM_010253478.1,XM_010253477.1
GO:0005230	extracellular ligand-gated ion channel activity	molecular_function	2.834e-07	8.7693e-05	XM_010269905.1,XM_010269904.1,XM_010260316.1,XM_010260319.1,XM_010260315.1,XM_010269908.1,XM_010269907.1,XM_010260322.1,XM_010269909.1,XM_010260323.1,XM_010260317.1,XM_010260318.1,XM_010269906.1,XM_010260324.1,XM_010260321.1
GO:0004357	glutamate-cysteine ligase activity	molecular_function	3.2796e-07	9.4715e-05	XM_010245547.1,XM_010245545.1,XM_010269933.1,XM_010245549.1,XM_010245546.1,XM_010245548.1,XM_010245544.1
GO:0042398	cellular modified amino acid biosynthetic process	biological_process	3.8169e-07	0.00010334	XM_010260322.1,XM_010245548.1,XM_010260242.1,XM_010260319.1,XM_010269933.1,XM_010260321.1,XM_010260318.1,XM_010245547.1,XM_010245545.1,XM_010260316.1,XM_010245546.1,XM_010260241.1,XM_010260324.1,XM_010245544.1,XM_010260317.1,XM_010260323.1,XM_010245549.1
GO:0030131	clathrin adaptor complex	cellular_component	1.4669e-06	0.00037379	XM_010260319.1,XM_010260316.1,XM_010260322.1,XM_010260323.1,XM_010260317.1,XM_010260324.1,XM_010244339.1,XM_010260321.1,XM_010260318.1
GO:0000105	histidine biosynthetic process	biological_process	1.824e-06	0.00043898	XM_010253477.1,XM_010253483.1,XM_010253484.1,XM_010253479.1,XM_010253480.1,XM_010253478.1,XM_010253481.1,XM_010253482.1
GO:0008652	cellular amino acid biosynthetic process	biological_process	2.0348e-06	0.00046394	XM_010242628.1,XM_010269933.1,XM_010260319.1,XM_010260242.1,XM_010245548.1,XM_010253482.1,XM_010260322.1,XM_010253477.1,XM_010242620.1,XM_010253483.1,XM_010245545.1,XM_010253484.1,XM_010245547.1,XM_010260318.1,XM_010253480.1,XM_010253478.1,XM_010260321.1,XM_010245546.1,XM_010260316.1,XM_010245549.1,XM_010260323.1,XM_010242636.1,XM_010260317.1,XM_010245544.1,XM_010253479.1,XM_010260324.1,XM_010260…
GO:0008009	chemokine activity	molecular_function	2.7302e-06	0.0005632	XM_010245570.1,XM_010245567.1,XM_010245568.1,XM_010245566.1,XM_010245569.1
GO:0042379	chemokine receptor binding	molecular_function	2.7302e-06	0.0005632	XM_010245566.1,XM_010245569.1,XM_010245567.1,XM_010245570.1,XM_010245568.1
GO:0051287	NAD binding	molecular_function	3.3036e-06	0.00059243	XM_010253481.1,XM_010253480.1,XM_010253479.1,XM_010253478.1,XM_010245149.1,XM_010245148.1,XM_010253484.1,XM_010253483.1,XM_010253477.1,XM_010253482.1,XM_010245151.1,XM_010245150.1,XM_010253391.1
GO:0004478	methionine adenosyltransferase activity	molecular_function	3.4189e-06	0.00059243	XM_010260322.1,XM_010260319.1,XM_010260316.1,XM_010260324.1,XM_010260321.1,XM_010260318.1,XM_010260323.1,XM_010260317.1
GO:0006556	S-adenosylmethionine biosynthetic process	biological_process	3.4189e-06	0.00059243	XM_010260322.1,XM_010260319.1,XM_010260316.1,XM_010260321.1,XM_010260324.1,XM_010260318.1,XM_010260317.1,XM_010260323.1
GO:0046500	S-adenosylmethionine metabolic process	biological_process	3.4189e-06	0.00059243	XM_010260317.1,XM_010260323.1,XM_010260321.1,XM_010260324.1,XM_010260318.1,XM_010260319.1,XM_010260316.1,XM_010260322.1
GO:0043631	RNA polyadenylation	biological_process	4.0805e-06	0.00067987	XM_010253482.1,XM_010253484.1,XM_010253477.1,XM_010253483.1,XM_010253481.1,XM_010253478.1,XM_010253480.1,XM_010253479.1
GO:0047487	oligogalacturonide lyase activity	molecular_function	5.8055e-06	0.00092544	XM_010276058.1,XM_010276059.1,XM_010276057.1,XM_010276055.1,XM_010276056.1
GO:0006547	histidine metabolic process	biological_process	6.1952e-06	0.00092544	XM_010253482.1,XM_010253481.1,XM_010253479.1,XM_010253478.1,XM_010253480.1,XM_010253484.1,XM_010253483.1,XM_010253477.1
GO:0052803	imidazole-containing compound metabolic process	biological_process	6.1952e-06	0.00092544	XM_010253481.1,XM_010253479.1,XM_010253478.1,XM_010253480.1,XM_010253484.1,XM_010253477.1,XM_010253483.1,XM_010253482.1
GO:0016884	carbon-nitrogen ligase activity, with glutamine as amido-N-donor	molecular_function	9.0408e-06	0.0013055	XM_010245544.1,XM_010245548.1,XM_010245546.1,XM_010270677.1,XM_010245549.1,XM_010245545.1,XM_010245547.1
GO:0030119	AP-type membrane coat adaptor complex	cellular_component	1.0444e-05	0.0014595	XM_010260323.1,XM_010260317.1,XM_010260318.1,XM_010260324.1,XM_010260321.1,XM_010244339.1,XM_010260316.1,XM_010260319.1,XM_010260322.1
GO:0006750	glutathione biosynthetic process	biological_process	1.2213e-05	0.0016533	XM_010245544.1,XM_010245548.1,XM_010245546.1,XM_010269933.1,XM_010245549.1,XM_010245545.1,XM_010245547.1
GO:0044272	sulfur compound biosynthetic process	biological_process	1.262e-05	0.0016567	XM_010260323.1,XM_010245545.1,XM_010260317.1,XM_010245547.1,XM_010245549.1,XM_010260324.1,XM_010260321.1,XM_010245544.1,XM_010260318.1,XM_010260319.1,XM_010245546.1,XM_010269933.1,XM_010260316.1,XM_010260322.1,XM_010245548.1
GO:0030259	lipid glycosylation	biological_process	1.4495e-05	0.0018468	XM_010262581.1,XM_010262582.1,XM_010270795.1,XM_010270794.1,XM_010262408.1,XM_010262407.1,XM_010262409.1
GO:0070403	NAD+ binding	molecular_function	1.6093e-05	0.0019918	XM_010245148.1,XM_010245150.1,XM_010245151.1,XM_010245149.1
GO:0031123	RNA 3'-end processing	biological_process	2.2692e-05	0.0027306	XM_010253482.1,XM_010253477.1,XM_010253483.1,XM_010253484.1,XM_010253480.1,XM_010253478.1,XM_010253479.1,XM_010253481.1
GO:0003916	DNA topoisomerase activity	molecular_function	2.6513e-05	0.0028697	XM_010276058.1,XM_010253661.1,XM_010260242.1,XM_010276057.1,XM_010276055.1,XM_010245754.1,XM_010242628.1,XM_010260241.1,XM_010276059.1,XM_010260277.1,XM_010260278.1,XM_010242636.1,XM_010276056.1,XM_010260275.1,XM_010242620.1
GO:0019184	nonribosomal peptide biosynthetic process	biological_process	2.8547e-05	0.0028697	XM_010245546.1,XM_010269933.1,XM_010245549.1,XM_010245545.1,XM_010245547.1,XM_010245544.1,XM_010245548.1
GO:0006518	peptide metabolic process	biological_process	2.8725e-05	0.0028697	XM_010245549.1,XM_010253477.1,XM_010245547.1,XM_010245545.1,XM_010253479.1,XM_010253480.1,XM_010253478.1,XM_010245544.1,XM_010253481.1,XM_010269933.1,XM_010245546.1,XM_010276025.1,XM_010245548.1,XM_010253482.1
GO:0010393	galacturonan metabolic process	biological_process	2.9161e-05	0.0028697	XM_010276055.1,XM_010276057.1,XM_010276058.1,XM_010276059.1,XM_010276056.1
GO:0045488	pectin metabolic process	biological_process	2.9161e-05	0.0028697	XM_010276056.1,XM_010276057.1,XM_010276055.1,XM_010276059.1,XM_010276058.1
GO:0045490	pectin catabolic process	biological_process	2.9161e-05	0.0028697	XM_010276056.1,XM_010276057.1,XM_010276055.1,XM_010276059.1,XM_010276058.1
GO:0006486	protein glycosylation	biological_process	2.981e-05	0.0028697	XM_010260324.1,XM_010276014.1,XM_010260321.1,XM_010260279.1,XM_010260318.1,XM_010260323.1,XM_010260317.1,XM_010260322.1,XM_010262338.1,XM_010262339.1,XM_010260319.1,XM_010262340.1,XM_010260316.1
GO:0009101	glycoprotein biosynthetic process	biological_process	2.981e-05	0.0028697	XM_010260324.1,XM_010260321.1,XM_010276014.1,XM_010260279.1,XM_010260318.1,XM_010260323.1,XM_010260317.1,XM_010260322.1,XM_010262338.1,XM_010262339.1,XM_010260319.1,XM_010262340.1,XM_010260316.1
GO:0043413	macromolecule glycosylation	biological_process	2.981e-05	0.0028697	XM_010262340.1,XM_010260319.1,XM_010260316.1,XM_010260322.1,XM_010262339.1,XM_010262338.1,XM_010260317.1,XM_010260323.1,XM_010276014.1,XM_010260321.1,XM_010260324.1,XM_010260318.1,XM_010260279.1
GO:0005048	signal sequence binding	molecular_function	3.8283e-05	0.0035285	XM_010269924.1,XM_010260293.1,XM_010269921.1,XM_010269923.1,XM_010269922.1
GO:0042277	peptide binding	molecular_function	3.8283e-05	0.0035285	XM_010269922.1,XM_010269923.1,XM_010269921.1,XM_010269924.1,XM_010260293.1
GO:0005786	signal recognition particle, endoplasmic reticulum targeting	cellular_component	4.0794e-05	0.0036066	XM_010269924.1,XM_010269923.1,XM_010269922.1,XM_010269921.1
GO:0030942	endoplasmic reticulum signal peptide binding	molecular_function	4.0794e-05	0.0036066	XM_010269924.1,XM_010269921.1,XM_010269923.1,XM_010269922.1
GO:0006955	immune response	biological_process	5.2327e-05	0.0045337	XM_010260322.1,XM_010245570.1,XM_010269908.1,XM_010260319.1,XM_010269905.1,XM_010260321.1,XM_010245568.1,XM_010260318.1,XM_010270794.1,XM_010269907.1,XM_010269904.1,XM_010245569.1,XM_010243119.1,XM_010260316.1,XM_010270795.1,XM_010260324.1,XM_010245567.1,XM_010269906.1,XM_010260323.1,XM_010260317.1,XM_010245566.1
GO:0009100	glycoprotein metabolic process	biological_process	6.6404e-05	0.0056404	XM_010260323.1,XM_010260317.1,XM_010260324.1,XM_010276014.1,XM_010260321.1,XM_010260279.1,XM_010260318.1,XM_010260319.1,XM_010262340.1,XM_010260316.1,XM_010260322.1,XM_010262338.1,XM_010262339.1
GO:0008360	regulation of cell shape	biological_process	6.9334e-05	0.0056671	XM_010274195.1,XM_010274193.1,XM_010274192.1,XM_010274194.1
GO:0022604	regulation of cell morphogenesis	biological_process	6.9334e-05	0.0056671	XM_010274194.1,XM_010274192.1,XM_010274193.1,XM_010274195.1
GO:0002263	cell activation involved in immune response	biological_process	8.4926e-05	0.0057484	XM_010269906.1,XM_010269907.1,XM_010269908.1,XM_010269904.1,XM_010269905.1
GO:0002274	myeloid leukocyte activation	biological_process	8.4926e-05	0.0057484	XM_010269905.1,XM_010269904.1,XM_010269908.1,XM_010269906.1,XM_010269907.1
GO:0002275	myeloid cell activation involved in immune response	biological_process	8.4926e-05	0.0057484	XM_010269907.1,XM_010269906.1,XM_010269908.1,XM_010269904.1,XM_010269905.1
GO:0002279	mast cell activation involved in immune response	biological_process	8.4926e-05	0.0057484	XM_010269905.1,XM_010269904.1,XM_010269908.1,XM_010269906.1,XM_010269907.1
GO:0002366	leukocyte activation involved in immune response	biological_process	8.4926e-05	0.0057484	XM_010269904.1,XM_010269905.1,XM_010269907.1,XM_010269906.1,XM_010269908.1
GO:0002444	myeloid leukocyte mediated immunity	biological_process	8.4926e-05	0.0057484	XM_010269907.1,XM_010269906.1,XM_010269908.1,XM_010269905.1,XM_010269904.1
GO:0002448	mast cell mediated immunity	biological_process	8.4926e-05	0.0057484	XM_010269904.1,XM_010269905.1,XM_010269908.1,XM_010269907.1,XM_010269906.1
GO:0043299	leukocyte degranulation	biological_process	8.4926e-05	0.0057484	XM_010269908.1,XM_010269906.1,XM_010269907.1,XM_010269905.1,XM_010269904.1
GO:0043303	mast cell degranulation	biological_process	8.4926e-05	0.0057484	XM_010269904.1,XM_010269905.1,XM_010269907.1,XM_010269906.1,XM_010269908.1
GO:0045055	regulated secretory pathway	biological_process	8.4926e-05	0.0057484	XM_010269908.1,XM_010269906.1,XM_010269907.1,XM_010269905.1,XM_010269904.1
GO:0045576	mast cell activation	biological_process	8.4926e-05	0.0057484	XM_010269905.1,XM_010269904.1,XM_010269907.1,XM_010269906.1,XM_010269908.1
GO:0070566	adenylyltransferase activity	molecular_function	0.00011696	0.0077948	XM_010253479.1,XM_010253478.1,XM_010253480.1,XM_010253481.1,XM_010253483.1,XM_010253477.1,XM_010253484.1,XM_010253482.1
GO:0002376	immune system process	biological_process	0.00011915	0.0078209	XM_010245567.1,XM_010260324.1,XM_010269906.1,XM_010260317.1,XM_010260323.1,XM_010245566.1,XM_010269907.1,XM_010270795.1,XM_010260316.1,XM_010245569.1,XM_010269904.1,XM_010243119.1,XM_010260321.1,XM_010245568.1,XM_010260318.1,XM_010270794.1,XM_010245570.1,XM_010260322.1,XM_010269908.1,XM_010260319.1,XM_010269905.1
GO:0004527	exonuclease activity	molecular_function	0.00014127	0.0090788	XM_010260322.1,XM_010260319.1,XM_010260316.1,XM_010260321.1,XM_010260324.1,XM_010260318.1,XM_010270682.1,XM_010248371.1,XM_010270681.1,XM_010260317.1,XM_010260323.1
GO:0002443	leukocyte mediated immunity	biological_process	0.00014251	0.0090788	XM_010269908.1,XM_010269906.1,XM_010269907.1,XM_010269905.1,XM_010269904.1
GO:0043043	peptide biosynthetic process	biological_process	0.000157	0.0098569	XM_010269933.1,XM_010276025.1,XM_010245546.1,XM_010245548.1,XM_010245549.1,XM_010245547.1,XM_010245545.1,XM_010245544.1
GO:0006487	protein N-linked glycosylation	biological_process	0.00017614	0.010901	XM_010262339.1,XM_010262338.1,XM_010260279.1,XM_010262340.1
GO:0004567	beta-mannosidase activity	molecular_function	0.00020028	0.011885	XM_010270681.1,XM_010270682.1
GO:0006080	substituted mannan metabolic process	biological_process	0.00020028	0.011885	XM_010270682.1,XM_010270681.1
GO:0016985	mannan endo-1,4-beta-mannosidase activity	molecular_function	0.00020028	0.011885	XM_010270681.1,XM_010270682.1
GO:0004221	ubiquitin thiolesterase activity	molecular_function	0.00021747	0.012573	XM_010253482.1,XM_010253479.1,XM_010253478.1,XM_010253480.1,XM_010253481.1,XM_010253483.1,XM_010253477.1,XM_010253484.1
GO:0001848	complement binding	molecular_function	0.00021778	0.012573	XM_010269892.1,XM_010269893.1,XM_010260315.1,XM_010245767.1,XM_010245768.1,XM_010245563.1,XM_010245564.1
GO:0017016	Ras GTPase binding	molecular_function	0.00022638	0.012573	XM_010245540.1,XM_010245541.1,XM_010245565.1,XM_010270659.1,XM_010270683.1,XM_010245537.1,XM_010270658.1,XM_010270684.1,XM_010245538.1,XM_010245539.1
GO:0031267	small GTPase binding	molecular_function	0.00022638	0.012573	XM_010270684.1,XM_010245537.1,XM_010270658.1,XM_010245539.1,XM_010245538.1,XM_010245540.1,XM_010245541.1,XM_010245565.1,XM_010270659.1,XM_010270683.1
GO:0051020	GTPase binding	molecular_function	0.00022638	0.012573	XM_010270659.1,XM_010270683.1,XM_010245565.1,XM_010245541.1,XM_010245540.1,XM_010245539.1,XM_010245538.1,XM_010270684.1,XM_010245537.1,XM_010270658.1
GO:0018196	peptidyl-asparagine modification	biological_process	0.00024651	0.013235	XM_010262338.1,XM_010262339.1,XM_010262340.1
GO:0018279	protein N-linked glycosylation via asparagine	biological_process	0.00024651	0.013235	XM_010262339.1,XM_010262338.1,XM_010262340.1
GO:0015276	ligand-gated ion channel activity	molecular_function	0.00025083	0.013235	XM_010269908.1,XM_010269907.1,XM_010260322.1,XM_010269909.1,XM_010269904.1,XM_010269905.1,XM_010260316.1,XM_010260319.1,XM_010260315.1,XM_010269906.1,XM_010260318.1,XM_010260324.1,XM_010260321.1,XM_010260323.1,XM_010260317.1
GO:0022834	ligand-gated channel activity	molecular_function	0.00025083	0.013235	XM_010269909.1,XM_010260322.1,XM_010269907.1,XM_010269908.1,XM_010260315.1,XM_010260319.1,XM_010260316.1,XM_010269904.1,XM_010269905.1,XM_010260321.1,XM_010260324.1,XM_010269906.1,XM_010260318.1,XM_010260317.1,XM_010260323.1
GO:0009057	macromolecule catabolic process	biological_process	0.00025357	0.013235	XM_010245563.1,XM_010253443.1,XM_010253391.1,XM_010242628.1,XM_010276058.1,XM_010253482.1,XM_010260414.1,XM_010253395.1,XM_010270681.1,XM_010253484.1,XM_010253396.1,XM_010253483.1,XM_010253477.1,XM_010242620.1,XM_010270799.1,XM_010248372.1,XM_010253478.1,XM_010253480.1,XM_010253393.1,XM_010253394.1,XM_010276055.1,XM_010276057.1,XM_010260419.1,XM_010270682.1,XM_010242636.1,XM_010276056.1,XM_010245…
GO:0033218	amide binding	molecular_function	0.00026388	0.013609	XM_010260293.1,XM_010269924.1,XM_010269922.1,XM_010269923.1,XM_010269921.1
GO:0016714	oxidoreductase activity, acting on paired donors, with incorporation or reduction of molecular oxygen, reduced pteridine as one donor, and incorporation of one atom of oxygen	molecular_function	0.00026722	0.013619	XM_010270675.1,XM_010270674.1,XM_010269906.1,XM_010269905.1,XM_010269904.1,XM_010269908.1,XM_010269907.1,XM_010270676.1,XM_010269909.1
GO:0008137	NADH dehydrogenase (ubiquinone) activity	molecular_function	0.00030581	0.015227	XM_010269904.1,XM_010248778.1,XM_010269918.1,XM_010269907.1,XM_010260292.1,XM_010242636.1,XM_010269906.1,XM_010244339.1,XM_010269905.1,XM_010242628.1,XM_010253414.1,XM_010269908.1,XM_010269909.1,XM_010242620.1,XM_010248777.1,XM_010260293.1
GO:0050136	NADH dehydrogenase (quinone) activity	molecular_function	0.00030581	0.015227	XM_010269908.1,XM_010269909.1,XM_010269905.1,XM_010242628.1,XM_010253414.1,XM_010248777.1,XM_010260293.1,XM_010242620.1,XM_010269907.1,XM_010269904.1,XM_010248778.1,XM_010269918.1,XM_010269906.1,XM_010244339.1,XM_010260292.1,XM_010242636.1
GO:0006520	cellular amino acid metabolic process	biological_process	0.00032018	0.015762	XM_010245547.1,XM_010242620.1,XM_010260321.1,XM_010253480.1,XM_010260318.1,XM_010260319.1,XM_010242628.1,XM_010269933.1,XM_010245563.1,XM_010253414.1,XM_010245548.1,XM_010260323.1,XM_010242636.1,XM_010260317.1,XM_010245564.1,XM_010270662.1,XM_010245549.1,XM_010262340.1,XM_010262338.1,XM_010245545.1,XM_010253484.1,XM_010253477.1,XM_010253483.1,XM_010276026.1,XM_010253478.1,XM_010248369.1,XM_010248…
GO:0032940	secretion by cell	biological_process	0.00032622	0.015878	XM_010269905.1,XM_010242628.1,XM_010253414.1,XM_010269919.1,XM_010253397.1,XM_010269920.1,XM_010253409.1,XM_010269908.1,XM_010260242.1,XM_010260291.1,XM_010242620.1,XM_010269904.1,XM_010269907.1,XM_010242636.1,XM_010253407.1,XM_010260241.1,XM_010269906.1
GO:0030258	lipid modification	biological_process	0.00034993	0.016843	XM_010262409.1,XM_010262407.1,XM_010262408.1,XM_010270795.1,XM_010270794.1,XM_010262582.1,XM_010262581.1
GO:0046903	secretion	biological_process	0.00035524	0.016911	XM_010260291.1,XM_010242620.1,XM_010253397.1,XM_010269920.1,XM_010253409.1,XM_010269919.1,XM_010260242.1,XM_010269908.1,XM_010253414.1,XM_010242628.1,XM_010269905.1,XM_010260241.1,XM_010269906.1,XM_010242636.1,XM_010253407.1,XM_010269907.1,XM_010269904.1
GO:0016837	carbon-oxygen lyase activity, acting on polysaccharides	molecular_function	0.00036315	0.0171	XM_010276057.1,XM_010276055.1,XM_010276059.1,XM_010276058.1,XM_010276056.1
GO:0045321	leukocyte activation	biological_process	0.00037899	0.017653	XM_010269907.1,XM_010269906.1,XM_010269908.1,XM_010269905.1,XM_010269904.1
GO:0016053	organic acid biosynthetic process	biological_process	0.0003921	0.01788	XM_010260319.1,XM_010242628.1,XM_010269933.1,XM_010260322.1,XM_010253482.1,XM_010245548.1,XM_010260242.1,XM_010253484.1,XM_010245545.1,XM_010245547.1,XM_010242620.1,XM_010253477.1,XM_010253483.1,XM_010260321.1,XM_010260318.1,XM_010253480.1,XM_010253478.1,XM_010245546.1,XM_010260316.1,XM_010260323.1,XM_010242636.1,XM_010260317.1,XM_010245549.1,XM_010260324.1,XM_010260241.1,XM_010253481.1,XM_010245…
GO:0046394	carboxylic acid biosynthetic process	biological_process	0.0003921	0.01788	XM_010260316.1,XM_010245546.1,XM_010260317.1,XM_010260323.1,XM_010242636.1,XM_010245549.1,XM_010253481.1,XM_010260241.1,XM_010260324.1,XM_010253479.1,XM_010245544.1,XM_010260319.1,XM_010269933.1,XM_010242628.1,XM_010253482.1,XM_010260322.1,XM_010260242.1,XM_010245548.1,XM_010245547.1,XM_010245545.1,XM_010253484.1,XM_010253483.1,XM_010242620.1,XM_010253477.1,XM_010260321.1,XM_010260318.1,XM_010253…
GO:0016755	transferase activity, transferring amino-acyl groups	molecular_function	0.00041156	0.018572	XM_010253482.1,XM_010253481.1,XM_010253479.1,XM_010253480.1,XM_010253478.1,XM_010253477.1,XM_010253443.1
GO:0004497	monooxygenase activity	molecular_function	0.00044191	0.019735	XM_010245552.1,XM_010269906.1,XM_010270674.1,XM_010270675.1,XM_010270676.1,XM_010245550.1,XM_010269909.1,XM_010269908.1,XM_010269907.1,XM_010245553.1,XM_010269905.1,XM_010269904.1
GO:0030118	clathrin coat	cellular_component	0.000447	0.019759	XM_010260321.1,XM_010244339.1,XM_010260324.1,XM_010260318.1,XM_010260317.1,XM_010260323.1,XM_010260322.1,XM_010260319.1,XM_010260316.1
GO:0030176	integral to endoplasmic reticulum membrane	cellular_component	0.00046526	0.020307	XM_010260284.1,XM_010262338.1,XM_010262339.1,XM_010260229.1,XM_010262340.1,XM_010260288.1,XM_010260286.1,XM_010260285.1,XM_010260287.1,XM_010260283.1,XM_010260289.1,XM_010260228.1
GO:0003954	NADH dehydrogenase activity	molecular_function	0.00046877	0.020307	XM_010269918.1,XM_010248778.1,XM_010269904.1,XM_010269907.1,XM_010242636.1,XM_010260292.1,XM_010244339.1,XM_010269906.1,XM_010253414.1,XM_010269905.1,XM_010242628.1,XM_010269909.1,XM_010269908.1,XM_010242620.1,XM_010248777.1,XM_010260293.1
GO:0016790	thiolester hydrolase activity	molecular_function	0.00062562	0.026834	XM_010253484.1,XM_010253477.1,XM_010253483.1,XM_010253481.1,XM_010253478.1,XM_010253480.1,XM_010253479.1,XM_010253482.1
GO:0002252	immune effector process	biological_process	0.00064491	0.02739	XM_010269905.1,XM_010269904.1,XM_010269908.1,XM_010269907.1,XM_010269906.1
GO:0030541	plasmid partitioning	biological_process	0.00075293	0.031667	XM_010270119.1,XM_010270118.1,XM_010270117.1
GO:0031227	intrinsic to endoplasmic reticulum membrane	cellular_component	0.00088732	0.03696	XM_010260286.1,XM_010260287.1,XM_010260283.1,XM_010260285.1,XM_010260289.1,XM_010260228.1,XM_010262338.1,XM_010262339.1,XM_010260284.1,XM_010260229.1,XM_010260288.1,XM_010262340.1
GO:0006511	ubiquitin-dependent protein catabolic process	biological_process	0.00090393	0.03729	XM_010253479.1,XM_010253481.1,XM_010253393.1,XM_010253394.1,XM_010253480.1,XM_010253478.1,XM_010248372.1,XM_010270799.1,XM_010253477.1,XM_010253483.1,XM_010253396.1,XM_010253484.1,XM_010260414.1,XM_010253395.1,XM_010253482.1,XM_010253443.1
GO:0006887	exocytosis	biological_process	0.00091246	0.03729	XM_010269906.1,XM_010242636.1,XM_010242620.1,XM_010269908.1,XM_010269907.1,XM_010269905.1,XM_010269904.1,XM_010242628.1
GO:0004832	valine-tRNA ligase activity	molecular_function	0.00094388	0.03786	XM_010262339.1,XM_010262338.1,XM_010262340.1
GO:0006438	valyl-tRNA aminoacylation	biological_process	0.00094388	0.03786	XM_010262339.1,XM_010262338.1,XM_010262340.1
GO:0019941	modification-dependent protein catabolic process	biological_process	0.00099455	0.039167	XM_010253482.1,XM_010260414.1,XM_010253395.1,XM_010253443.1,XM_010248372.1,XM_010270799.1,XM_010253480.1,XM_010253478.1,XM_010253484.1,XM_010253483.1,XM_010253396.1,XM_010253477.1,XM_010253393.1,XM_010253394.1,XM_010253481.1,XM_010253479.1
GO:0043632	modification-dependent macromolecule catabolic process	biological_process	0.00099455	0.039167	XM_010253394.1,XM_010253393.1,XM_010253479.1,XM_010253481.1,XM_010253443.1,XM_010253395.1,XM_010260414.1,XM_010253482.1,XM_010253396.1,XM_010253483.1,XM_010253477.1,XM_010253484.1,XM_010253480.1,XM_010253478.1,XM_010270799.1,XM_010248372.1
GO:0016651	oxidoreductase activity, acting on NAD(P)H	molecular_function	0.0010338	0.040347	XM_010253414.1,XM_010245563.1,XM_010242628.1,XM_010269905.1,XM_010245538.1,XM_010269908.1,XM_010269909.1,XM_010245537.1,XM_010242620.1,XM_010248777.1,XM_010260293.1,XM_010248778.1,XM_010269904.1,XM_010269918.1,XM_010269907.1,XM_010245539.1,XM_010245564.1,XM_010260292.1,XM_010245541.1,XM_010242636.1,XM_010245540.1,XM_010269906.1,XM_010244339.1
GO:0044265	cellular macromolecule catabolic process	biological_process	0.0010713	0.041435	XM_010270681.1,XM_010253484.1,XM_010253396.1,XM_010253483.1,XM_010242620.1,XM_010253477.1,XM_010270799.1,XM_010248372.1,XM_010253480.1,XM_010253478.1,XM_010253443.1,XM_010242628.1,XM_010253482.1,XM_010260414.1,XM_010253395.1,XM_010270682.1,XM_010242636.1,XM_010253481.1,XM_010253479.1,XM_010253394.1,XM_010253393.1
GO:0043603	cellular amide metabolic process	biological_process	0.0011697	0.044537	XM_010245546.1,XM_010276025.1,XM_010269933.1,XM_010245548.1,XM_010253482.1,XM_010253477.1,XM_010245549.1,XM_010245545.1,XM_010245547.1,XM_010245544.1,XM_010253478.1,XM_010253480.1,XM_010253479.1,XM_010253481.1
GO:0022603	regulation of anatomical structure morphogenesis	biological_process	0.001172	0.044537	XM_010274195.1,XM_010274193.1,XM_010260419.1,XM_010274192.1,XM_010274194.1

## Sheet: Supplementary Table 8
Supplementary Table 8. List of the 60 genes located in the highly differentiated genomic regions between the LA and SA lotus groups.
No.	Gene ID	Number of the specific SNPs and InDels	Function annotation
1	LOC104593693	2 nonsynonymous SNP	UPF0481 protein At3g47200-like
		1 frameshift insertion
2	LOC104593510	1 nonsynonymous SNP	L-2-hydroxyglutarate dehydrogenase, mitochondrial
3	LOC104593516	1 nonsynonymous SNP	L-aminoadipate-semialdehyde dehydrogenase-phosphopantetheinyl transferase-like
4	LOC104593696	4 nonsynonymous SNP	uncharacterized LOC104593696
		1 frameshift deletion
5	LOC104593522	2 nonsynonymous SNP	probable peptide/nitrate transporter At3g43790
6	LOC104593545	1 nonsynonymous SNP	ubiquitin-conjugating enzyme E2 22
7	LOC104593574	1 nonsynonymous SNP	caffeoylshikimate esterase-like
8	LOC104593575	1 nonsynonymous SNP	histidinol dehydrogenase, chloroplastic
9	LOC104593723	1 nonsynonymous SNP	polygalacturonase-like
10	LOC104598259	3 nonsynonymous SNP	zinc finger protein ZPR1 homolog
11	LOC104598265	1 nonsynonymous SNP	mediator of RNA polymerase II transcription subunit 21
12	LOC104598267	2 nonsynonymous SNP	cytochrome b561 and DOMON domain-containing protein At3g07570-like
13	LOC104598268	2 nonsynonymous SNP	pentatricopeptide repeat-containing protein At3g62470, mitochondrial-like
14	LOC104598287	1 nonsynonymous SNP	histidine protein methyltransferase 1 homolog
15	LOC104598291	6 nonsynonymous SNP	uncharacterized LOC104598291
		1 stopgain
16	LOC104598378	4 nonsynonymous SNP	cellulose synthase-like protein D1
17	LOC104598292	3 nonsynonymous SNP	RNA polymerase II subunit 5-mediating protein homolog
		1 stopgain
18	LOC104598379	1 nonsynonymous SNP	putative pectinesterase/pectinesterase inhibitor 28
19	LOC104598294	2 nonsynonymous SNP	CMP-sialic acid transporter 4-like
20	LOC104598300	1 nonsynonymous SNP	uncharacterized LOC104598300
21	LOC104598383	3 nonsynonymous SNP	uncharacterized LOC104598383
22	LOC104598311	5 nonsynonymous SNP	aspartyl protease family protein At5g10770-like
23	LOC104598313	1 nonsynonymous SNP	receptor-like protein 12
24	LOC104598322	5 nonsynonymous SNP	patatin-like protein 7
25	LOC104599833	1 nonsynonymous SNP	uncharacterized LOC104599833
26	LOC104599698	2 nonsynonymous SNP	copper-transporting ATPase RAN1
27	LOC104599701	3 nonsynonymous SNP	valine--tRNA ligase, chloroplastic/mitochondrial 2
28	LOC104599844	1 nonsynonymous SNP	UDP-glycosyltransferase 71K1-like
29	LOC104605229	5 nonsynonymous SNP	disease resistance protein At4g27190-like
		1 frameshift deletion
30	LOC104605321	7 nonsynonymous SNP	uncharacterized LOC104605321
		1 frameshift insertion
31	LOC104605248	1 nonsynonymous SNP	putative receptor-like protein kinase At3g47110
32	LOC104605468	1 stopgain	uncharacterized LOC104605468
33	LOC104605879	1 nonsynonymous SNP	probable calcium-binding protein CML44
34	LOC104609644	1 nonsynonymous SNP	dentin sialophosphoprotein
35	LOC104609696	1 nonsynonymous SNP	uncharacterized LOC104609696
36	LOC104609655	1 nonsynonymous SNP	anthocyanin 5-aromatic acyltransferase-like
37	LOC104609656	1 nonsynonymous SNP	probable E3 ubiquitin-protein ligase RHC1A
38	LOC104609704	2 nonsynonymous SNP	uncharacterized LOC104609704
39	LOC104609670	8 nonsynonymous SNP	putative G-type lectin S-receptor-like serine/threonine-protein kinase At1g61610
40	LOC104609687	2 nonsynonymous SNP	uncharacterized LOC104609687
41	LOC104612170	3 nonsynonymous SNP	ankyrin repeat-containing protein At5g02620-like
42	LOC104586303	1 nonsynonymous SNP	uncharacterized LOC104586303
43	LOC104586844	3 nonsynonymous SNP	uncharacterized LOC104586844
44	LOC104587513	2 nonsynonymous SNP	pentatricopeptide repeat-containing protein At3g07290， mitochondrial
45	LOC104587812	2 nonsynonymous SNP	uncharacterized LOC104587812
46	LOC104587816	1 nonsynonymous SNP	fatty acid amide hydrolase-like
47	LOC104587832	2 nonsynonymous SNP	uncharacterized LOC104587832
48	LOC104587820	2 nonsynonymous SNP	uncharacterized LOC104587820
49	LOC104587821	1 nonsynonymous SNP	CBS domain-containing protein CBSCBSPB3-like
50	LOC104587835	1 nonsynonymous SNP	uncharacterized protein At5g39865-like
51	LOC104587826	1 nonsynonymous SNP	uncharacterized LOC104587826
52	LOC104587836	2 nonsynonymous SNP	uncharacterized LOC104587836
53	LOC104587827	1 nonsynonymous SNP	small glutamine-rich tetratricopeptide repeat-containing protein
54	LOC104587837	1 nonsynonymous SNP	uncharacterized LOC104587837
55	LOC104589889	1 nonsynonymous SNP	aspartate, glycine, lysine and serine-rich protein-like
56	LOC104589899	1 nonsynonymous SNP	probable rRNA-processing protein EBP2 homolog
57	LOC104590208	1 nonsynonymous SNP	3-oxoacyl-[acyl-carrier-protein] synthase， mitochondrial
58	LOC104591005	1 nonsynonymous SNP	polygalacturonase-like
59	LOC104587630	1 nonframeshift insertion	FT-interacting protein 1
60	LOC104605880	1 stopgain	GATA transcription factor 7-like
